# Supplementary material
Source: HighWire-hosted journal article supplement (https://cmaj.ca/highwire/filestream/57740/field_highwire_adjunct_files/1/registration-will-appendix_2.pdf)
Supplement: registration-will-appendix_2.pdf [file registration-will-appendix_2.pdf]

**Appendix 2: Observational studies first received Nov. 1, 2007 through Mar. 26, 2010**

|                           | Time perspective*  |             |                 |               |  |         |       |
|---------------------------|--------------------|-------------|-----------------|---------------|--|---------|-------|
|                           |                    | Prospective | Cross-Sectional | Retrospective |  | Missing | Total |
| Study design <sup>†</sup> | Cohort             | 2 617       | 265             | 305           |  | 95      | 3 282 |
|                           | Case only          | 995         | 191             | 140           |  | 39      | 1 365 |
|                           | Case–Control       | 848         | 232             | 102           |  | 41      | 1 223 |
|                           | Other <sup>†</sup> | 136         | 78              | 25            |  | 14      | 253   |
|                           | Missing            | 752         | 97              | 91            |  | 672     | 1 612 |
|                           | Total              | 5 348       | 863             | 663           |  | 861     | 7 735 |

\*Time perspective and study design (ClinicalTrials.gov data element – Observational Study Model) definitions available at: <http://prsinfo.clinicaltrials.gov/definitions.html>.

<sup>†</sup>Includes: case-crossover, ecologic or community, family based, and other.
